## CORRECTION

# Correction: Transcriptional and physiological analyses of reduced density in apple provide insight into the regulation involved in photosynthesis

Junqiang Niu, Ming Ma, Xiaoning Yin, Xinglu Liu, Tie Dong, Wentai Sun, Fuxia Yang

There is an error in the Funding statement. The correct Funding statement is as follows: This research was supported by the National Natural Science Foundation of China (31760556), Agricultural science and technology innovation project of Gansu Academy of Agricultural Sciences (2016GAAS14); National key Research and Development plan project (2016YFD001135); Science and technology research project of apple industry in Gansu Province (GPCK2011-1); Fruit tree science observation station project in Northwest China of Ministry of agriculture (10218020). The funders had no role in study design, data collection and analysis, decision to publish, or preparation of the manuscript.

## Reference

1. Niu J, Ma M, Yin X, Liu X, Dong T, Sun W, et al. (2020) Transcriptional and physiological analyses of reduced density in apple provide insight into the regulation involved in photosynthesis. PLoS ONE 15 (10): e0239737. <https://doi.org/10.1371/journal.pone.0239737> PMID: 33044972

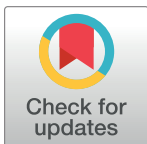

## OPEN ACCESS

**Citation:** Niu J, Ma M, Yin X, Liu X, Dong T, Sun W, et al. (2020) Correction: Transcriptional and physiological analyses of reduced density in apple provide insight into the regulation involved in photosynthesis. PLoS ONE 15(12): e0244012. <https://doi.org/10.1371/journal.pone.0244012>

**Published:** December 9, 2020

**Copyright:** © 2020 Niu et al. This is an open access article distributed under the terms of the [Creative Commons Attribution License](https://creativecommons.org/licenses/by/4.0/), which permits unrestricted use, distribution, and reproduction in any medium, provided the original author and source are credited.
